# Supplementary material
Source: Elsevier journal article supplement (https://comptes-rendus.academie-sciences.fr/chimie/article/10.1016/j.crci.2007.02.002/file/attach/mmc5.pdf)
Supplement: mmc5 [file mmc5.pdf]

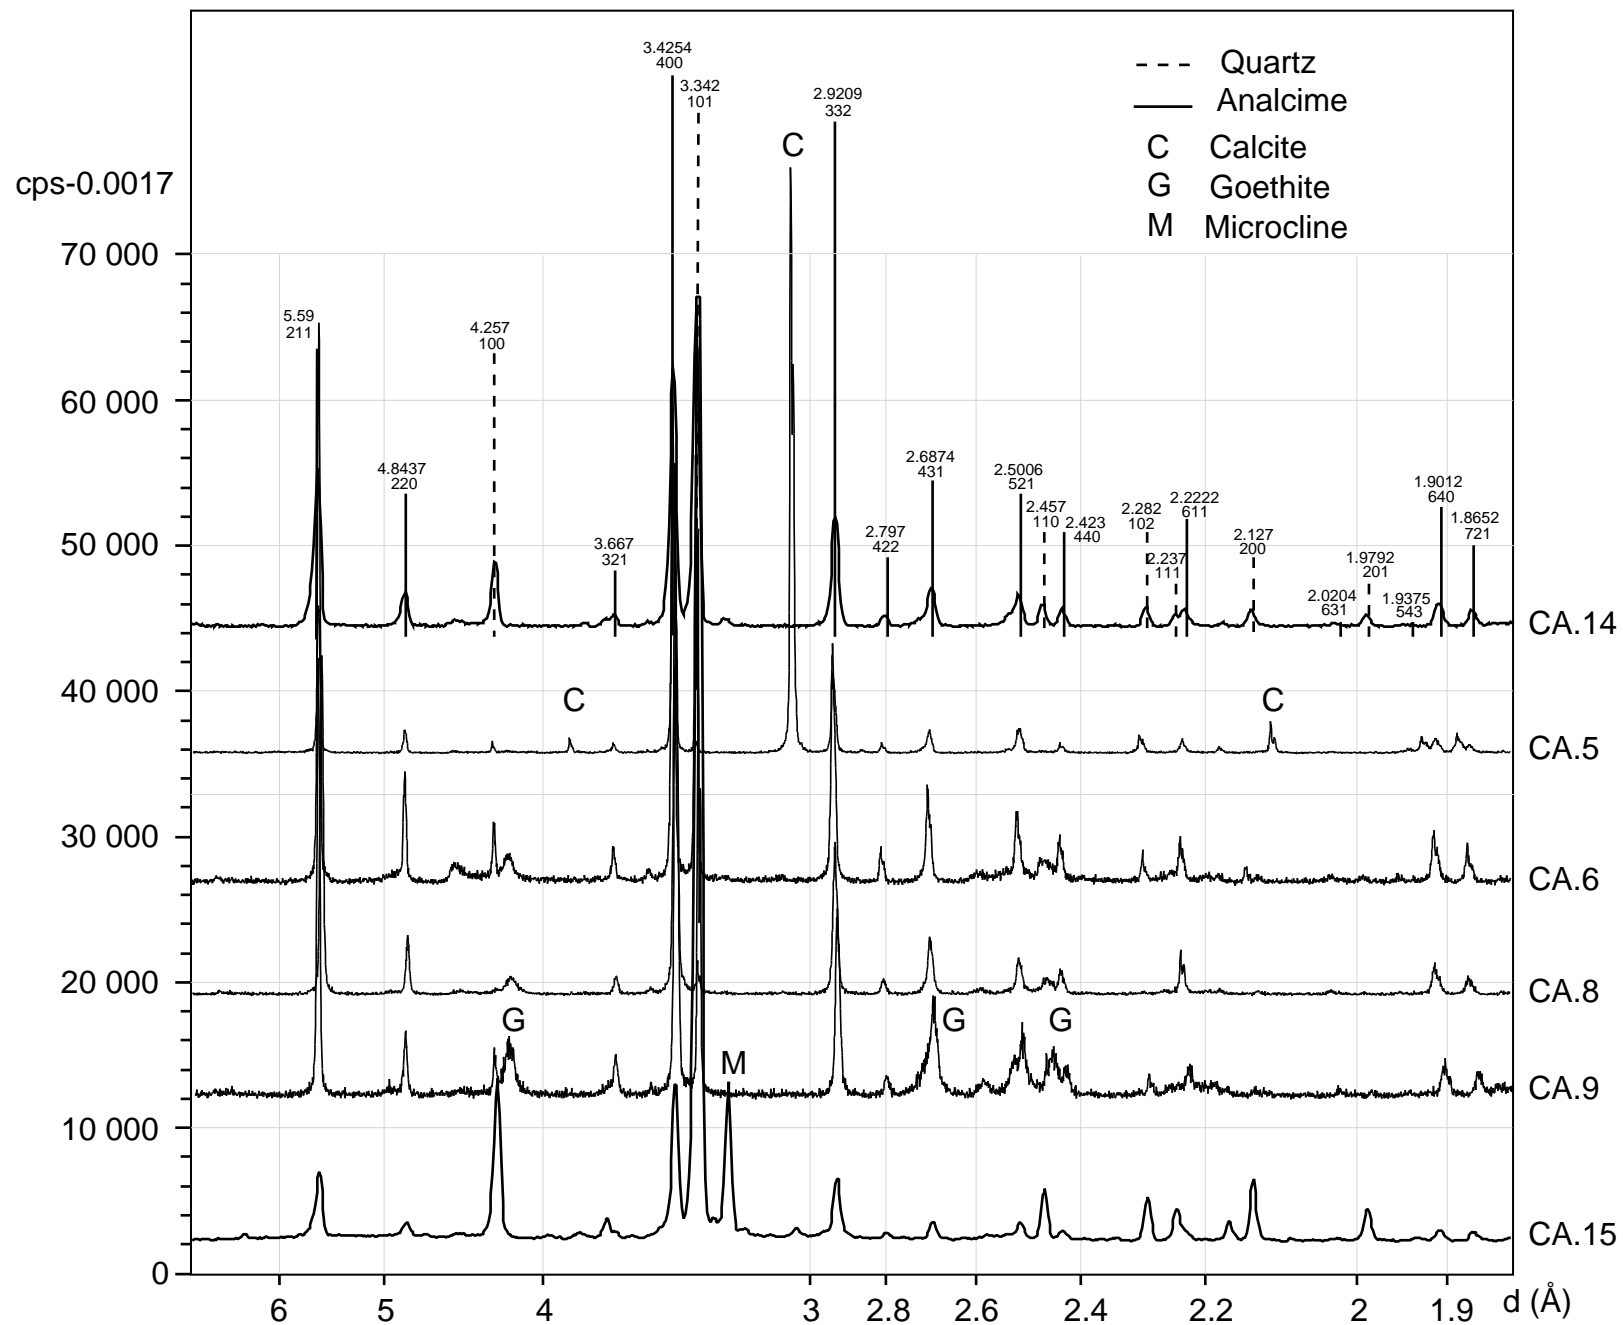

Figure S-3.c : Diffractogrammes DRX des échantillons contenant d'autres phases cristallines en dehors de l'analcime et du quartz.
